# Supplementary material for: Quantum chemical calculations of31P NMR chemical shifts: scopes and limitations
Source: Royal Society of Chemistry journal article supplement (doi:10.1039/c5cp00240k), 2015-01-01
Supplement: c5cp00240k1.pdf [file c5cp00240k1.pdf]

## Electronic Supplementary Information for:

# Quantum Chemical Calculations of $^{31}\text{P}$ NMR Chemical Shifts: Scopes and Limitations

*Shamil K. Latypov\**, *Fedor M. Polyancev*, *Dmitry G. Yakhvarov* and *Oleg G. Sinyashin*

A. E. Arbuzov Institute of Organic and Physical Chemistry of the Russian Academy of Sciences, Arbuzov str.  
8, 420088, Kazan, Russia

[lsk@iopc.ru](mailto:lsk@iopc.ru)

## Table of contents

|                                                                                                                                                                                                                                                                                                                 |    |
|-----------------------------------------------------------------------------------------------------------------------------------------------------------------------------------------------------------------------------------------------------------------------------------------------------------------|----|
| <b>Figure S1.</b> Experimental <i>versus</i> calculated $^{31}\text{P}$ CS correlation coefficients $R^2$ for different (functional/basis set) approaches used at geometry optimization for <b>2, 3, 5-20, 25, 29, 31, 33</b> at PBE1PBE/6-31G(d) level for CS calculations.                                    | 3  |
| <b>Table S1.</b> Experimental <i>versus</i> calculated $^{31}\text{P}$ CS correlation coefficient $R^2$ and linear regression parameters (slope, intercept) for different (functional/basis set) approaches used at geometry optimization for <b>1-34</b> at PBE1PBE/6-31G(d) level for CS calculations.        | 3  |
| <b>Figure S2.</b> Experimental <i>versus</i> calculated $^{31}\text{P}$ CS correlation coefficients $R^2$ for different (functional/basis set) approaches used at geometry optimization for <b>2, 3, 5-20, 25, 29, 31, 33</b> at PBE1PBE/6-311++G(2d,2p) level for CS calculations.                             | 5  |
| <b>Table S2.</b> Experimental <i>versus</i> calculated $^{31}\text{P}$ CS correlation coefficient $R^2$ and linear regression parameters (slope, intercept) for different (functional/basis set) approaches used at geometry optimization for <b>1-34</b> at PBE1PBE/6-311++G(2d,2p) level for CS calculations. | 5  |
| <b>Figure S3.</b> Experimental <i>versus</i> calculated $^{31}\text{P}$ CS correlation coefficient $R^2$ for different (functional/basis set) approaches used at CS calculation for <b>2, 3, 5-20, 25, 29, 31, 33</b> at PBE1PBE/6-31G(d) level for geometry optimization.                                      | 7  |
| <b>Table S3.</b> Experimental <i>versus</i> calculated $^{31}\text{P}$ CS correlation coefficient $R^2$ and linear regression parameters (slope, intercept) for different (functional/basis set) approaches used at CS calculation for <b>1-34</b> at PBE1PBE/6-31G(d) level for geometry optimization.         | 7  |
| <b>Figure S4.</b> Experimental <i>versus</i> calculated $^{31}\text{P}$ CS correlation coefficient $R^2$ for different (functional/basis set) approaches used at CS calculation for <b>2, 3, 5-20, 25, 29, 31, 33</b> at PBE1PBE/6-31+G(d,p) level for geometry optimization.                                   | 9  |
| <b>Table S4.</b> Experimental <i>versus</i> calculated $^{31}\text{P}$ CS correlation coefficient $R^2$ and linear regression parameters (slope, intercept) for different (functional/basis set) approaches used at CS calculation for <b>1-34</b> at PBE1PBE/6-31+G(d,p) level for geometry optimization.      | 9  |
| <b>Figure S5.</b> Experimental <i>versus</i> calculated $^{31}\text{P}$ CS correlation coefficient $R^2$ for different (functional/basis set) approaches used at CS calculation for <b>2, 3, 5-20, 25, 29, 31, 33</b> at PBE1PBE/6-311++G(2d,2p) level for geometry optimization.                               | 11 |

|                                                                                                                                                                                                                                                                                                                |    |
|----------------------------------------------------------------------------------------------------------------------------------------------------------------------------------------------------------------------------------------------------------------------------------------------------------------|----|
| <b>Table S5.</b> Experimental <i>versus</i> calculated $^{31}\text{P}$ CS correlation coefficient $R^2$ and linear regression parameters (slope, intercept) for different (functional/basis set) approaches used at CS calculation for <b>1-34</b> at PBE1PBE/6-311++G(2d,2p) level for geometry optimization. | 11 |
| <b>Table S6.</b> CPU time ( $t$ ) dependence on the indicated basis set used at geometry optimization and $^{31}\text{P}$ CS calculation for <b>35</b> .                                                                                                                                                       | 13 |
| <b>Table S7.</b> CPU time dependence on level of theory for <b>5</b> .                                                                                                                                                                                                                                         | 13 |
| <b>Table S8.</b> Calculated dipole moments ( $\mu$ , D), $^{31}\text{P}$ shielding constants ( $\sigma_{\text{iso}}$ , ppm) and experimental $^{31}\text{P}$ CSs ( $\delta$ , ppm) for <b>4, 7, 36-38</b> .                                                                                                    | 14 |
| <b>Table S9.</b> Experimental ( $\delta_{\text{exp}}$ ) and calculated $^{31}\text{P}$ CSs ( $\delta$ , ppm) and relative energies (kcal/mol) for <b>1, 2, 3, 39</b> .                                                                                                                                         | 14 |
| <b>Table S10.</b> Calculated (unscaled and scaled) and experimental $^{31}\text{P}$ CSs ( $\delta_{\text{exp}}$ , ppm) for <b>35, 40-48</b> .                                                                                                                                                                  | 15 |
| <b>Table S11.</b> Experimental ( $\delta_{\text{exp}}$ ) and calculated ( $\delta_{\text{scaled}}$ ) $^{31}\text{P}$ CSs, $\Delta\delta = \delta_{\text{scaled}} - \delta_{\text{exp}}$ for isomers of <b>45</b> .                                                                                             | 16 |

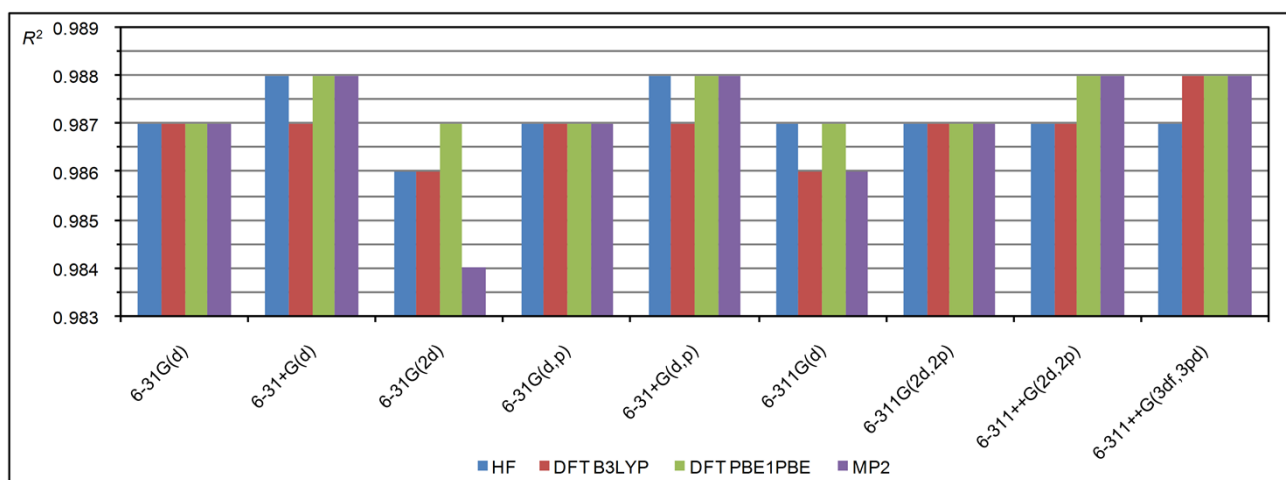

**Figure S1.** Experimental *versus* calculated <sup>31</sup>P CS correlation coefficients  $R^2$  for different (functional/basis set) approaches used at geometry optimization for **2, 3, 5-20, 25, 29, 31, 33** at PBE1PBE/6-31G(d) level for CS calculations.

**Table S1.** Experimental *versus* calculated <sup>31</sup>P CS correlation coefficient  $R^2$  and linear regression parameters (slope, intercept) for different (functional/basis set) approaches used at geometry optimization for **1-34** at PBE1PBE/6-31G(d) level for CS calculations.

| Geometry Optimization | $R^2$ | $R^2$ (without low/high field region) | $R^2$ (without low/high field region and "difficult" cases) | Slope | Intercept |
|-----------------------|-------|---------------------------------------|-------------------------------------------------------------|-------|-----------|
| HF/6-31G(d)           | 0.937 | 0.897                                 | 0.987                                                       | 0.935 | 3.0       |
| B3LYP/6-31G(d)        | 0.920 | 0.874                                 | 0.987                                                       | 0.961 | -2.9      |
| PBE1PBE/6-31G(d)      | 0.934 | 0.919                                 | 0.987                                                       | 0.918 | -3.0      |
| MP2/6-31G(d)          | 0.933 | 0.919                                 | 0.987                                                       | 0.964 | -4.7      |
| HF/6-31+G(d)          | 0.937 | 0.921                                 | 0.988                                                       | 0.937 | 4.0       |
| B3LYP/6-31+G(d)       | 0.921 | 0.906                                 | 0.987                                                       | 0.969 | -0.8      |
| PBE1PBE/6-31+G(d)     | 0.934 | 0.920                                 | 0.988                                                       | 0.963 | -2.1      |
| MP2/6-31+G(d)         | 0.934 | 0.921                                 | 0.988                                                       | 0.980 | -4.0      |
| HF/6-31G(2d)          | 0.933 | 0.917                                 | 0.986                                                       | 0.923 | 4.3       |
| B3LYP/6-31G(2d)       | 0.921 | 0.907                                 | 0.986                                                       | 0.952 | -0.8      |
| PBE1PBE/6-31G(2d)     | 0.934 | 0.920                                 | 0.987                                                       | 0.951 | -2.4      |
| MP2/6-31G(2d)         | 0.923 | 0.912                                 | 0.984                                                       | 0.959 | 2.8       |
| HF/6-31G(d,p)         | 0.937 | 0.921                                 | 0.987                                                       | 0.931 | 4.4       |
| B3LYP/6-31G(d,p)      | 0.920 | 0.905                                 | 0.987                                                       | 0.962 | 2.8       |
| PBE1PBE/6-31G(d,p)    | 0.942 | 0.929                                 | 0.987                                                       | 0.957 | -3.5      |
| MP2/6-31G(d,p)        | 0.933 | 0.919                                 | 0.987                                                       | 0.978 | -6.1      |
| HF/6-31+G(d,p)        | 0.937 | 0.921                                 | 0.988                                                       | 0.933 | 5.3       |

|                           |       |       |       |       |      |
|---------------------------|-------|-------|-------|-------|------|
| B3LYP/6-31+G(d,p)         | 0.921 | 0.906 | 0.987 | 0.969 | -0.4 |
| PBE1PBE/6-31+G(d,p)       | 0.934 | 0.920 | 0.988 | 0.963 | -1.5 |
| MP2/6-31+G(d,p)           | 0.934 | 0.921 | 0.988 | 0.982 | -4.6 |
| HF/6-311G(d)              | 0.933 | 0.916 | 0.987 | 0.921 | 8.9  |
| B3LYP/6-311G(d)           | 0.914 | 0.897 | 0.986 | 0.958 | 2.8  |
| PBE1PBE/6-311G(d)         | 0.929 | 0.913 | 0.987 | 0.951 | 2.1  |
| MP2/6-311G(d)             | 0.928 | 0.913 | 0.986 | 0.953 | 2.1  |
| HF/6-311G(2d,2p)          | 0.932 | 0.916 | 0.987 | 0.916 | 5.5  |
| B3LYP/6-311G(2d,2p)       | 0.921 | 0.906 | 0.987 | 0.958 | -0.8 |
| PBE1PBE/6-311G(2d,2p)     | 0.935 | 0.921 | 0.987 | 0.952 | -1.8 |
| MP2/6-311G(2d,2p)         | 0.924 | 0.914 | 0.987 | 0.968 | -4.1 |
| HF/6-311++G(2d,2p)        | 0.933 | 0.917 | 0.987 | 0.917 | 6.1  |
| B3LYP/6-311++G(2d,2p)     | 0.922 | 0.908 | 0.987 | 0.963 | 0.3  |
| PBE1PBE/6-311++G(2d,2p)   | 0.936 | 0.922 | 0.988 | 0.956 | -0.9 |
| MP2/6-311++G(2d,2p)       | 0.925 | 0.915 | 0.988 | 0.975 | -3.4 |
| HF/6-311++G(3df,3pd)      | 0.938 | 0.922 | 0.987 | 0.909 | 5.9  |
| B3LYP/6-311++G(3df,3pd)   | 0.930 | 0.915 | 0.988 | 0.950 | 0.9  |
| PBE1PBE/6-311++G(3df,3pd) | 0.941 | 0.927 | 0.988 | 0.943 | -0.5 |
| MP2/6-311++G(3df,3pd)     | 0.939 | 0.926 | 0.988 | 0.960 | -2.9 |

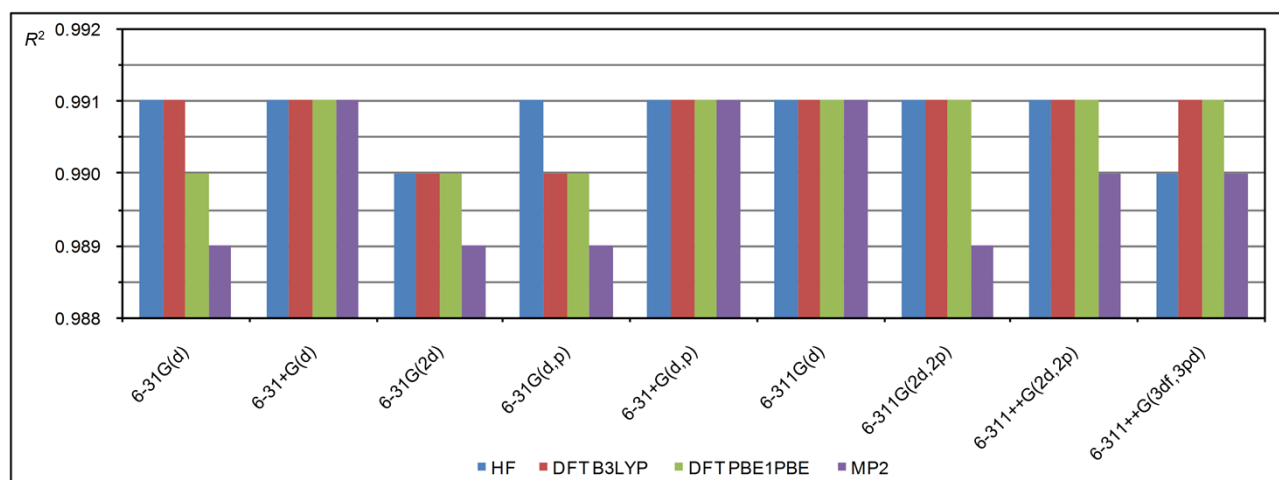

**Figure S2.** Experimental *versus* calculated <sup>31</sup>P CS correlation coefficients  $R^2$  for different (functional/basis set) approaches used at geometry optimization for **2, 3, 5-20, 25, 29, 31, 33** at PBE1PBE/6-311++G(2d,2p) level for CS calculations.

**Table S2.** Experimental *versus* calculated <sup>31</sup>P CS correlation coefficient  $R^2$  and linear regression parameters (slope, intercept) for different (functional/basis set) approaches used at geometry optimization for **1-34** at PBE1PBE/6-311++G(2d,2p) level for CS calculations.

| Geometry Optimization | $R^2$ | $R^2$ (without low/high field region) | $R^2$ (without low/high field region and "difficult" cases) | Slope | Intercept |
|-----------------------|-------|---------------------------------------|-------------------------------------------------------------|-------|-----------|
| HF/6-31G(d)           | 0.958 | 0.947                                 | 0.991                                                       | 1.090 | -9.2      |
| B3LYP/6-31G(d)        | 0.944 | 0.932                                 | 0.991                                                       | 1.119 | -15.4     |
| PBE1PBE/6-31G(d)      | 0.955 | 0.943                                 | 0.990                                                       | 1.115 | -16.3     |
| MP2/6-31G(d)          | 0.952 | 0.941                                 | 0.989                                                       | 1.120 | -16.9     |
| HF/6-31+G(d)          | 0.958 | 0.947                                 | 0.991                                                       | 1.092 | -8.2      |
| B3LYP/6-31+G(d)       | 0.945 | 0.932                                 | 0.991                                                       | 1.128 | -13.3     |
| PBE1PBE/6-31+G(d)     | 0.949 | 0.935                                 | 0.991                                                       | 1.121 | -14.6     |
| MP2/6-31+G(d)         | 0.953 | 0.942                                 | 0.991                                                       | 1.127 | -15.6     |
| HF/6-31G(2d)          | 0.957 | 0.945                                 | 0.990                                                       | 1.078 | -7.7      |
| B3LYP/6-31G(2d)       | 0.941 | 0.927                                 | 0.990                                                       | 1.111 | -13.1     |
| PBE1PBE/6-31G(2d)     | 0.949 | 0.937                                 | 0.990                                                       | 1.110 | -14.7     |
| MP2/6-31G(2d)         | 0.947 | 0.938                                 | 0.989                                                       | 1.114 | -15.2     |
| HF/6-31G(d,p)         | 0.959 | 0.947                                 | 0.991                                                       | 1.086 | -7.7      |
| B3LYP/6-31G(d,p)      | 0.944 | 0.932                                 | 0.990                                                       | 1.120 | -15.3     |
| PBE1PBE/6-31G(d,p)    | 0.953 | 0.941                                 | 0.990                                                       | 1.115 | -16.0     |
| MP2/6-31G(d,p)        | 0.949 | 0.940                                 | 0.989                                                       | 1.127 | -15.8     |
| HF/6-31+G(d,p)        | 0.958 | 0.947                                 | 0.991                                                       | 1.088 | -6.8      |

|                           |       |       |       |       |        |
|---------------------------|-------|-------|-------|-------|--------|
| B3LYP/6-31+G(d,p)         | 0.945 | 0.932 | 0.991 | 1.128 | -12.9  |
| PBE1PBE/6-31+G(d,p)       | 0.955 | 0.943 | 0.991 | 1.121 | -14.0  |
| MP2/6-31+G(d,p)           | 0.953 | 0.942 | 0.991 | 1.141 | -16.8  |
| HF/6-311G(d)              | 0.956 | 0.944 | 0.991 | 1.076 | -2.9   |
| B3LYP/6-311G(d)           | 0.940 | 0.926 | 0.991 | 1.117 | -9.6   |
| PBE1PBE/6-311G(d)         | 0.952 | 0.939 | 0.991 | 1.108 | -10.21 |
| MP2/6-311G(d)             | 0.950 | 0.938 | 0.991 | 1.111 | -9.2   |
| HF/6-311G(2d,2p)          | 0.956 | 0.945 | 0.991 | 1.070 | -6.5   |
| B3LYP/6-311G(2d,2p)       | 0.946 | 0.934 | 0.991 | 1.117 | -13.1  |
| PBE1PBE/6-311G(2d,2p)     | 0.956 | 0.946 | 0.991 | 1.110 | -14.1  |
| MP2/6-311G(2d,2p)         | 0.947 | 0.938 | 0.989 | 1.127 | -16.5  |
| HF/6-311++G(2d,2p)        | 0.957 | 0.945 | 0.991 | 1.073 | -6.1   |
| B3LYP/6-311++G(2d,2p)     | 0.947 | 0.935 | 0.991 | 1.122 | -12.1  |
| PBE1PBE/6-311++G(2d,2p)   | 0.957 | 0.946 | 0.991 | 1.114 | -13.3  |
| MP2/6-311++G(2d,2p)       | 0.948 | 0.940 | 0.990 | 1.134 | -15.7  |
| HF/6-311++G(3df,3pd)      | 0.961 | 0.949 | 0.990 | 1.063 | -5.9   |
| B3LYP/6-311++G(3df,3pd)   | 0.953 | 0.941 | 0.991 | 1.108 | -11.3  |
| PBE1PBE/6-311++G(3df,3pd) | 0.961 | 0.950 | 0.991 | 1.103 | -12.4  |
| MP2/6-311++G(3df,3pd)     | 0.958 | 0.948 | 0.990 | 1.119 | -15.1  |

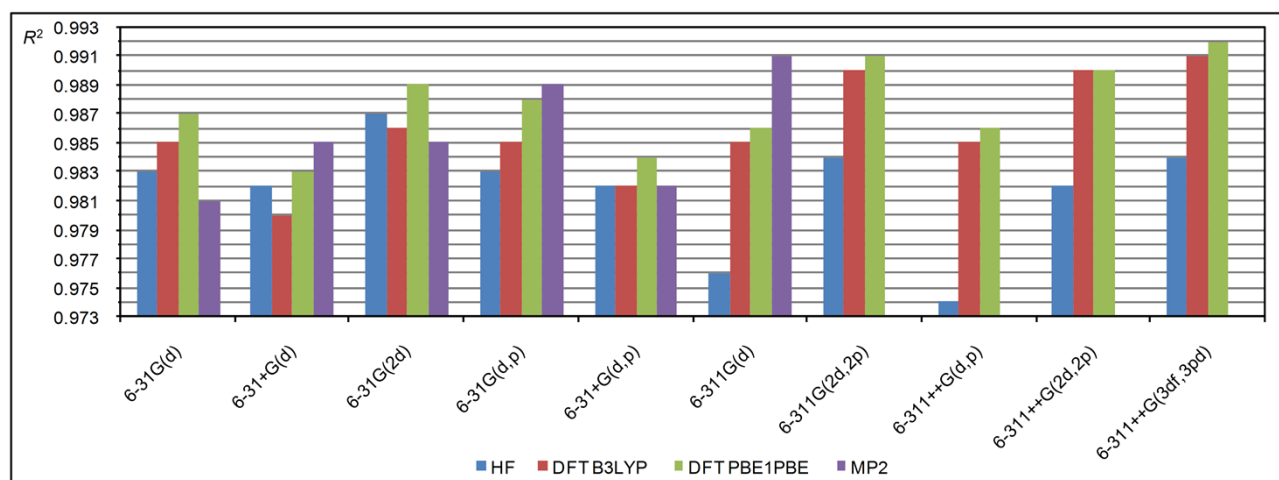

**Figure S3.** Experimental *versus* calculated  $^{31}\text{P}$  CS correlation coefficient  $R^2$  for different (functional/basis set) approaches used at CS calculation for **2, 3, 5-20, 25, 29, 31, 33** at PBE1PBE/6-31G(d) level for geometry optimization.

**Table S3.** Experimental *versus* calculated  $^{31}\text{P}$  CS correlation coefficient  $R^2$  and linear regression parameters (slope, intercept) for different (functional/basis set) approaches used at CS calculation for **1-34** at PBE1PBE/6-31G(d) level for geometry optimization.

| CS calculations    | $R^2$ | $R^2$ (without low/high field region) | $R^2$ (without low/high field region and "difficult" cases) | Slope | Intercept |
|--------------------|-------|---------------------------------------|-------------------------------------------------------------|-------|-----------|
| HF/6-31G(d)        | 0.933 | 0.916                                 | 0.983                                                       | 0.897 | -5.0      |
| B3LYP/6-31G(d)     | 0.923 | 0.905                                 | 0.985                                                       | 0.926 | 1.6       |
| PBE1PBE/6-31G(d)   | 0.934 | 0.919                                 | 0.987                                                       | 0.918 | -3.0      |
| MP2/6-31G(d)       | 0.927 | 0.910                                 | 0.981                                                       | 0.923 | -12.2     |
| HF/6-31+G(d)       | 0.933 | 0.916                                 | 0.982                                                       | 0.899 | -9.6      |
| B3LYP/6-31+G(d)    | 0.929 | 0.912                                 | 0.980                                                       | 0.927 | -3.8      |
| PBE1PBE/6-31+G(d)  | 0.938 | 0.924                                 | 0.983                                                       | 0.958 | -9.5      |
| MP2/6-31+G(d)      | 0.924 | 0.904                                 | 0.985                                                       | 0.926 | -14.4     |
| HF/6-31G(2d)       | 0.952 | 0.938                                 | 0.987                                                       | 0.935 | -25.2     |
| B3LYP/6-31G(2d)    | 0.941 | 0.925                                 | 0.986                                                       | 0.991 | -26.6     |
| PBE1PBE/6-31G(2d)  | 0.949 | 0.935                                 | 0.989                                                       | 0.971 | -29.8     |
| MP2/6-31G(2d)      | 0.928 | 0.907                                 | 0.985                                                       | 0.986 | -31.8     |
| HF/6-31G(d,p)      | 0.933 | 0.917                                 | 0.983                                                       | 0.905 | -6.9      |
| B3LYP/6-31G(d,p)   | 0.923 | 0.906                                 | 0.985                                                       | 0.941 | 1.0       |
| PBE1PBE/6-31G(d,p) | 0.934 | 0.919                                 | 0.988                                                       | 0.971 | -6.3      |
| MP2/6-31G(d,p)     | 0.926 | 0.905                                 | 0.989                                                       | 0.923 | -9.0      |
| HF/6-31+G(d,p)     | 0.934 | 0.917                                 | 0.982                                                       | 0.908 | -11.2     |



|                           |                |       |       |       |       |
|---------------------------|----------------|-------|-------|-------|-------|
| B3LYP/6-31+G(d,p)         | 0.930          | 0.913 | 0.982 | 0.943 | -6.1  |
| PBE1PBE/6-31+G(d,p)       | 0.941          | 0.927 | 0.984 | 0.974 | -11.6 |
| MP2/6-31+G(d,p)           | 0.925          | 0.905 | 0.982 | 0.917 | -11.8 |
| HF/6-311G(d)              | 0.935          | 0.919 | 0.976 | 0.998 | -12.2 |
| B3LYP/6-311G(d)           | 0.944          | 0.930 | 0.985 | 1.062 | -12.8 |
| PBE1PBE/6-311G(d)         | 0.948          | 0.936 | 0.986 | 1.080 | -19.9 |
| MP2/6-311G(d)             | 0.959          | 0.947 | 0.991 | 1.086 | -23.7 |
| HF/6-311G(2d,2p)          | 0.951          | 0.938 | 0.984 | 1.008 | -7.1  |
| B3LYP/6-311G(2d,2p)       | 0.948          | 0.935 | 0.990 | 1.094 | 9.4   |
| PBE1PBE/6-311G(2d,2p)     | 0.955          | 0.944 | 0.991 | 1.111 | -16.0 |
| MP2/6-311G(2d,2p)         | – <sup>a</sup> | –     | –     | –     | –     |
| HF/6-311++G(d,p)          | 0.937          | 0.922 | 0.974 | 1.009 | -10.5 |
| B3LYP/6-311++G(d,p)       | 0.942          | 0.927 | 0.985 | 1.083 | -11.6 |
| PBE1PBE /6-311++G(d,p)    | 0.948          | 0.936 | 0.986 | 1.100 | -18.7 |
| MP2/6-311++G(d,p)         | –              | –     | –     | –     | –     |
| HF/6-311++G(2d,2p)        | 0.952          | 0.938 | 0.982 | 1.010 | -6.4  |
| B3LYP/6-311++G(2d,2p)     | 0.947          | 0.934 | 0.990 | 1.096 | -8.8  |
| PBE1PBE/6-311++G(2d,2p)   | 0.955          | 0.943 | 0.990 | 1.115 | -16.3 |
| MP2/6-311++G(2d,2p)       | –              | –     | –     | –     | –     |
| HF/6-311++G(3df,3pd)      | 0.949          | 0.936 | 0.984 | 1.007 | -3.9  |
| B3LYP/6-311++G(3df,3pd)   | 0.946          | 0.932 | 0.991 | 1.099 | -7.5  |
| PBE1PBE/6-311++G(3df,3pd) | 0.953          | 0.941 | 0.992 | 1.120 | -15.4 |
| MP2/6-311++G(3df,3pd)     | –              | –     | –     | –     | –     |

<sup>a</sup> Not affordable for computational reasons.

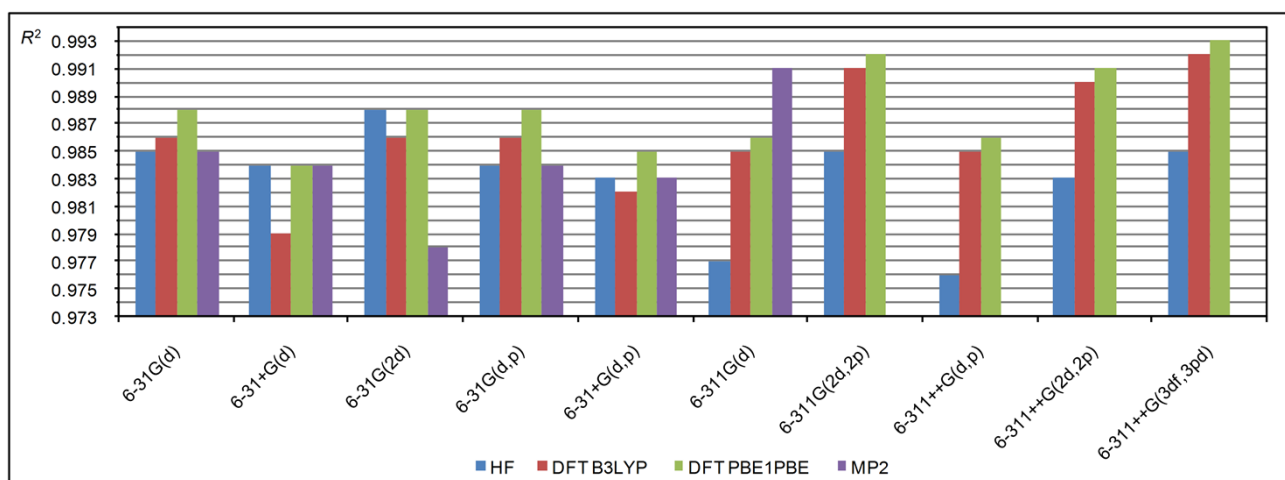

**Figure S4.** Experimental *versus* calculated  $^{31}\text{P}$  CS correlation coefficient  $R^2$  for different (functional/basis set) approaches used at CS calculation for **2, 3, 5-20, 25, 29, 31, 33** at PBE1PBE/6-31+G(d,p) level for geometry optimization.

**Table S4.** Experimental *versus* calculated  $^{31}\text{P}$  CS correlation coefficient  $R^2$  and linear regression parameters (slope, intercept) for different (functional/basis set) approaches used at CS calculation for **1-34** at PBE1PBE/6-31+G(d,p) level for geometry optimization.

| CS calculations    | $R^2$ | $R^2$ (without low/high field region) | $R^2$ (without low/high field region and "difficult" cases) | Slope | Intercept |
|--------------------|-------|---------------------------------------|-------------------------------------------------------------|-------|-----------|
| HF/6-31G(d)        | 0.934 | 0.918                                 | 0.985                                                       | 0.902 | -3.3      |
| B3LYP/6-31G(d)     | 0.924 | 0.907                                 | 0.986                                                       | 0.938 | 3.5       |
| PBE1PBE/6-31G(d)   | 0.934 | 0.920                                 | 0.988                                                       | 0.963 | -1.5      |
| MP2/6-31G(d)       | 0.921 | 0.899                                 | 0.985                                                       | 0.902 | -3.3      |
| HF/6-31+G(d)       | 0.935 | 0.918                                 | 0.984                                                       | 0.904 | -8.0      |
| B3LYP/6-31+G(d)    | 0.929 | 0.911                                 | 0.979                                                       | 0.928 | -2.7      |
| PBE1PBE/6-31+G(d)  | 0.939 | 0.925                                 | 0.984                                                       | 0.965 | -7.3      |
| MP2/6-31+G(d)      | 0.924 | 0.904                                 | 0.984                                                       | 0.926 | -11.9     |
| HF/6-31G(2d)       | 0.953 | 0.939                                 | 0.988                                                       | 0.939 | -23.9     |
| B3LYP/6-31G(2d)    | 0.942 | 0.925                                 | 0.986                                                       | 0.997 | -24.9     |
| PBE1PBE/6-31G(2d)  | 0.949 | 0.935                                 | 0.988                                                       | 1.018 | -28.8     |
| MP2/6-31G(2d)      | 0.952 | 0.938                                 | 0.978                                                       | 0.989 | -24.5     |
| HF/6-31G(d,p)      | 0.935 | 0.919                                 | 0.984                                                       | 0.910 | -5.1      |
| B3LYP/6-31G(d,p)   | 0.924 | 0.907                                 | 0.986                                                       | 0.947 | 1.3       |
| PBE1PBE/6-31G(d,p) | 0.935 | 0.920                                 | 0.988                                                       | 0.977 | -4.0      |
| MP2/6-31G(d,p)     | 0.933 | 0.916                                 | 0.984                                                       | 0.910 | -5.1      |
| HF/6-31+G(d,p)     | 0.935 | 0.919                                 | 0.983                                                       | 0.913 | -9.6      |

|                           |                |       |       |       |       |
|---------------------------|----------------|-------|-------|-------|-------|
| B3LYP/6-31+G(d,p)         | 0.930          | 0.914 | 0.982 | 0.943 | -6.1  |
| PBE1PBE/6-31+G(d,p)       | 0.940          | 0.926 | 0.985 | 0.980 | -9.4  |
| MP2/6-31+G(d,p)           | 0.941          | 0.924 | 0.983 | 0.920 | -10.0 |
| HF/6-311G(d)              | 0.937          | 0.921 | 0.977 | 1.003 | -10.4 |
| B3LYP/6-311G(d)           | 0.942          | 0.928 | 0.985 | 1.070 | -10.2 |
| PBE1PBE/6-311G(d)         | 0.949          | 0.937 | 0.986 | 1.086 | -17.4 |
| MP2/6-311G(d)             | 0.958          | 0.946 | 0.991 | 1.100 | -21.2 |
| HF/6-311G(2d,2p)          | 0.953          | 0.940 | 0.985 | 1.013 | -5.3  |
| B3LYP/6-311G(2d,2p)       | 0.949          | 0.935 | 0.991 | 1.100 | -7.0  |
| PBE1PBE/6-311G(2d,2p)     | 0.956          | 0.944 | 0.992 | 1.118 | -14.3 |
| MP2/6-311G(2d,2p)         | — <sup>a</sup> | —     | —     | —     | —     |
| HF/6-311++G(d,p)          | 0.939          | 0.923 | 0.976 | 1.015 | -8.8  |
| B3LYP/6-311++G(d,p)       | 0.942          | 0.928 | 0.985 | 1.090 | -9.2  |
| PBE1PBE/6-311++G(d,p)     | 0.949          | 0.937 | 0.986 | 1.106 | -16.4 |
| MP2/6-311++G(d,p)         | —              | —     | —     | —     | —     |
| HF/6-311++G(2d,2p)        | 0.953          | 0.940 | 0.983 | 1.015 | -4.6  |
| B3LYP/6-311++G(2d,2p)     | 0.946          | 0.932 | 0.990 | 1.103 | -6.4  |
| PBE1PBE/6-311++G(2d,2p)   | 0.955          | 0.943 | 0.991 | 1.121 | -14.0 |
| MP2/6-311++G(2d,2p)       | —              | —     | —     | —     | —     |
| HF/6-311++G(3df,3pd)      | 0.951          | 0.937 | 0.985 | 1.012 | -2.1  |
| B3LYP/6-311++G(3df,3pd)   | 0.947          | 0.933 | 0.992 | 1.105 | -5.1  |
| PBE1PBE/6-311++G(3df,3pd) | 0.954          | 0.942 | 0.993 | 1.126 | -13.0 |
| MP2/6-311++G(3df,3pd)     | —              | —     | —     | —     | —     |

<sup>a</sup> Not affordable for computational reasons.

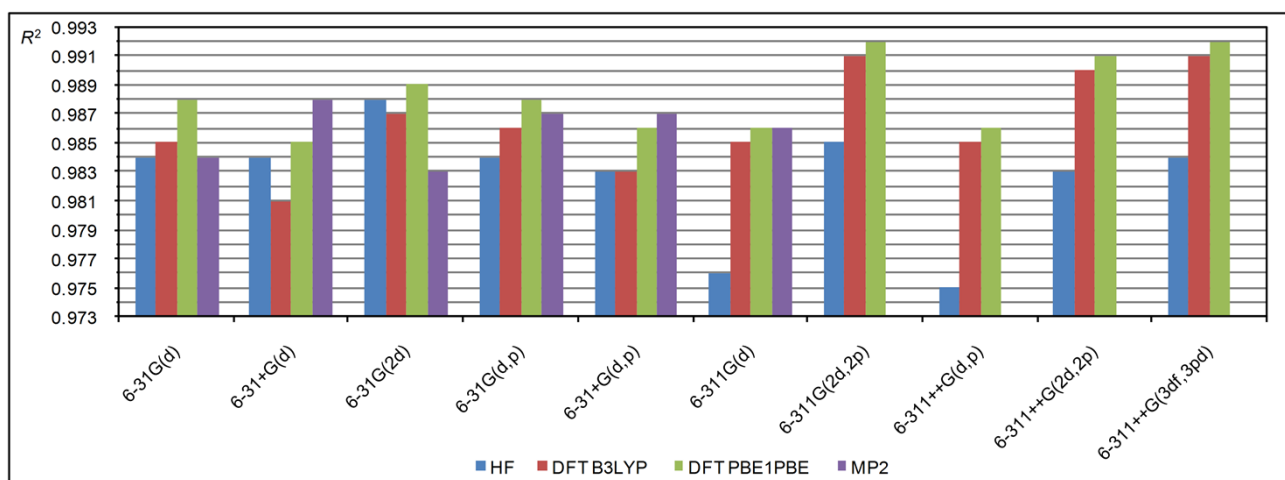

**Figure S5.** Experimental *versus* calculated  $^{31}\text{P}$  CS correlation coefficient  $R^2$  for different (functional/basis set) approaches used at CS calculation for **2, 3, 5-20, 25, 29, 31, 33** at PBE1PBE/6-311++G(2d,2p) level for geometry optimization.

**Table S5.** Experimental *versus* calculated  $^{31}\text{P}$  CS correlation coefficient  $R^2$  and linear regression parameters (slope, intercept) for different (functional/basis set) approaches used at CS calculation for **1-34** at PBE1PBE/6-311++G(2d,2p) level for geometry optimization.

| CS calculations    | $R^2$ | $R^2$ (without low/high field region) | $R^2$ (without low/high field region and "difficult" cases) | Slope | Intercept |
|--------------------|-------|---------------------------------------|-------------------------------------------------------------|-------|-----------|
| HF/6-31G(d)        | 0.937 | 0.922                                 | 0.984                                                       | 0.897 | -2.6      |
| B3LYP/6-31G(d)     | 0.925 | 0.909                                 | 0.985                                                       | 0.925 | 4.5       |
| PBE1PBE/6-31G(d)   | 0.936 | 0.922                                 | 0.988                                                       | 0.956 | -0.9      |
| MP2/6-31G(d)       | 0.938 | 0.923                                 | 0.984                                                       | 0.898 | -2.3      |
| HF/6-31+G(d)       | 0.938 | 0.922                                 | 0.984                                                       | 0.898 | -7.2      |
| B3LYP/6-31+G(d)    | 0.932 | 0.916                                 | 0.981                                                       | 0.926 | -1.2      |
| PBE1PBE/6-31+G(d)  | 0.941 | 0.928                                 | 0.985                                                       | 0.957 | -6.9      |
| MP2/6-31+G(d)      | 0.927 | 0.909                                 | 0.988                                                       | 0.898 | -20.8     |
| HF/6-31G(2d)       | 0.955 | 0.943                                 | 0.988                                                       | 0.937 | -23.7     |
| B3LYP/6-31G(2d)    | 0.944 | 0.928                                 | 0.987                                                       | 0.992 | -24.5     |
| PBE1PBE/6-31G(2d)  | 0.952 | 0.938                                 | 0.989                                                       | 1.014 | -28.4     |
| MP2/6-31G(2d)      | 0.928 | 0.907                                 | 0.983                                                       | 1.064 | -39.8     |
| HF/6-31G(d,p)      | 0.938 | 0.923                                 | 0.984                                                       | 0.905 | -4.4      |
| B3LYP/6-31G(d,p)   | 0.925 | 0.909                                 | 0.986                                                       | 0.939 | 2.0       |
| PBE1PBE/6-31G(d,p) | 0.936 | 0.923                                 | 0.988                                                       | 0.970 | -3.4      |
| MP2/6-31G(d,p)     | 0.935 | 0.917                                 | 0.987                                                       | 0.954 | -15.0     |
| HF/6-31+G(d,p)     | 0.939 | 0.924                                 | 0.983                                                       | 0.908 | -8.8      |

|                           |                |       |       |       |       |
|---------------------------|----------------|-------|-------|-------|-------|
| B3LYP/6-31+G(d,p)         | 0.933          | 0.917 | 0.983 | 0.942 | -3.5  |
| PBE1PBE/6-31+G(d,p)       | 0.942          | 0.929 | 0.986 | 0.972 | -9.0  |
| MP2/6-31+G(d,p)           | 0.933          | 0.914 | 0.987 | 0.956 | -19.0 |
| HF/6-311G(d)              | 0.939          | 0.924 | 0.976 | 0.987 | -8.3  |
| B3LYP/6-311G(d)           | 0.944          | 0.931 | 0.985 | 1.060 | -8.9  |
| PBE1PBE/6-311G(d)         | 0.951          | 0.940 | 0.986 | 1.078 | -16.3 |
| MP2/6-311G(d)             | 0.931          | 0.915 | 0.986 | 0.999 | -11.2 |
| HF/6-311G(2d,2p)          | 0.956          | 0.944 | 0.985 | 1.009 | -4.3  |
| B3LYP/6-311G(2d,2p)       | 0.951          | 0.938 | 0.991 | 1.093 | -6.1  |
| PBE1PBE/6-311G(2d,2p)     | 0.958          | 0.947 | 0.992 | 1.112 | -13.6 |
| MP2/6-311G(2d,2p)         | — <sup>a</sup> | —     | —     | —     | —     |
| HF/6-311++G(d,p)          | 0.942          | 0.928 | 0.975 | 1.008 | -7.3  |
| B3LYP/6-311++G(d,p)       | 0.944          | 0.931 | 0.985 | 1.080 | -7.9  |
| PBE1PBE/6-311++G(d,p)     | 0.951          | 0.940 | 0.986 | 1.098 | -15.2 |
| MP2/6-311++G(d,p)         | —              | —     | —     | —     | —     |
| HF/6-311++G(2d,2p)        | 0.956          | 0.944 | 0.983 | 1.010 | -3.7  |
| B3LYP/6-311++G(2d,2p)     | 0.950          | 0.937 | 0.990 | 1.095 | -5.6  |
| PBE1PBE/6-311++G(2d,2p)   | 0.957          | 0.946 | 0.991 | 1.114 | -13.3 |
| MP2/6-311++G(2d,2p)       | —              | —     | —     | —     | —     |
| HF/6-311++G(3df,3pd)      | 0.954          | 0.941 | 0.984 | 1.008 | -1.3  |
| B3LYP/6-311++G(3df,3pd)   | 0.949          | 0.936 | 0.991 | 1.098 | -4.5  |
| PBE1PBE/6-311++G(3df,3pd) | 0.956          | 0.945 | 0.992 | 1.120 | -12.6 |
| MP2/6-311++G(3df,3pd)     | —              | —     | —     | —     | —     |

<sup>a</sup> Not affordable for computational reasons.

**Table S6.** CPU time ( $t$ ) dependence on the indicated basis set used at geometry optimization and  $^{31}\text{P}$  CS calculation for **35**.

| Basis set <sup>a</sup> | Geometry optimization |                       | CS calculation |                       |
|------------------------|-----------------------|-----------------------|----------------|-----------------------|
|                        | $t^b$                 | $t_{\text{relative}}$ | $t^b$          | $t_{\text{relative}}$ |
| 6-31G(d)               | 6.5                   | 1.0                   | 0.6            | 1.0                   |
| 6-31G(d,p)             | 8.2                   | 1.3                   | 0.8            | 1.4                   |
| 6-31G(2d)              |                       |                       | 1.3            | 2.2                   |
| 6-311G(d)              |                       |                       | 1.3            | 2.3                   |
| 6-31+G(d)              | 31.0                  | 4.8                   | 2.6            | 4.6                   |
| 6-31+G(d,p)            |                       |                       | 3.9            | 6.9                   |
| 6-311G(2d,2p)          | 98.1                  | 15.2                  | 4.9            | 8.7                   |
| 6-311++G(d,p)          |                       |                       | 6.6            | 11.7                  |
| 6-311++G(2d,2p)        |                       |                       | 22.7           | 40.1                  |
| 6-311++G(3df,3pd)      |                       |                       | 103.8          | 183.1                 |

<sup>a</sup> At DFT PBE1PBE level of theory; <sup>b</sup> In hours.

**Table S7.** CPU time dependence on level of theory for **5**.

| Level of theory <sup>a</sup> | Geometry optimization |                       | CS calculation |                       |
|------------------------------|-----------------------|-----------------------|----------------|-----------------------|
|                              | $t^b$                 | $t_{\text{relative}}$ | $t^b$          | $t_{\text{relative}}$ |
| HF                           | 0.3                   | 1.0                   | 0.018          | 1.0                   |
| DFT PBE1PBE                  | 0.4                   | 1.3                   | 0.021          | 1.2                   |
| MP2                          | 1.5                   | 5.4                   | 0.579          | 31.1                  |

<sup>a</sup> With 6-31G(d) basis set; <sup>b</sup> In hours.

**Table S8.** Calculated dipole moments ( $\mu$ , D),  $^{31}\text{P}$  shielding constants<sup>a</sup> ( $\sigma_{\text{iso}}$ , ppm) and experimental  $^{31}\text{P}$  CSs ( $\delta$ , ppm) for **4**, **7**, **36-38**.

| Molecules                                       | $\mu$ | $\sigma_{\text{iso}}$ , gas phase | $\sigma_{\text{iso}}$ , PCM, C <sub>6</sub> H <sub>6</sub> | $\sigma_{\text{iso}}$ , PCM, CHCl <sub>3</sub> | $\delta_{\text{exp}}$ C <sub>6</sub> H <sub>6</sub> | $\delta_{\text{exp}}$ CHCl <sub>3</sub> |
|-------------------------------------------------|-------|-----------------------------------|------------------------------------------------------------|------------------------------------------------|-----------------------------------------------------|-----------------------------------------|
| H <sub>3</sub> PO <sub>4</sub> ( <b>4</b> )     | 0.02  | 374.8                             | 375.3                                                      | 375.5                                          |                                                     |                                         |
| (CH <sub>3</sub> ) <sub>3</sub> PO ( <b>7</b> ) | 4.32  | 369.6                             | 362.7                                                      | 359.0                                          |                                                     |                                         |
| P(OEt) <sub>3</sub> ( <b>36</b> )               | 1.50  | 228.5                             | 228.6                                                      | 229.3                                          | 139.2                                               | 139.5                                   |
| HP(O)(OEt) <sub>2</sub> ( <b>37</b> )           | 4.45  | 369.2                             | 365.6                                                      | 363.1                                          | 7.7                                                 | 8.1                                     |
| CIP(O)(OEt) <sub>2</sub> ( <b>38</b> )          | 2.86  | 351.4                             | 350.7                                                      | 351.0                                          | 3.8                                                 | 4.6                                     |

<sup>a</sup> At PBE1PBE/6-31G(d)//PBE1PBE/6-31G(d)

**Table S9.** Experimental ( $\delta_{\text{exp}}$ ) and calculated  $^{31}\text{P}$  CSs ( $\delta$ , ppm) and relative energies (kcal/mol) for **1**, **2**, **3**, **39**.

| Molecules                                                                          | $\delta_{\text{exp}}$ | Calculations <sup>a</sup> |            |                                       |            |
|------------------------------------------------------------------------------------|-----------------------|---------------------------|------------|---------------------------------------|------------|
|                                                                                    |                       | Gas phase                 |            | In H <sub>2</sub> O (in frame of PCM) |            |
|                                                                                    |                       | $\delta$                  | $\Delta E$ | $\delta$                              | $\Delta E$ |
| H <sub>3</sub> PO ( <b>1a</b> )                                                    | -13.9                 | -49.7                     | 3.2        | -45.1                                 | 0          |
| H <sub>2</sub> POH ( <b>1b</b> )                                                   |                       | 33.7                      | 0          | 34.7                                  | 0.5        |
| H <sub>2</sub> P(O)OH ( <b>2a</b> )                                                | 12.5                  | -0.2                      | 0          | -1.1                                  | 0          |
| HP(OH) <sub>2</sub> ( <b>2b</b> )                                                  |                       | 153.9                     | 5.3        | 155.0                                 | 7.1        |
| HP(O)(OH) <sub>2</sub> ( <b>3a</b> )                                               | 3.0                   | 6.0                       | 0          | -3.2                                  | 0          |
| P(OH) <sub>3</sub> ( <b>3b</b> )                                                   |                       | 94.1                      | 14.3       | 85.4                                  | 10.2       |
| C <sub>6</sub> F <sub>5</sub> (C <sub>2</sub> F <sub>5</sub> )POH ( <b>39a</b> )   | 80.6                  | 71.4                      | 0          | 65.8                                  | 0          |
| C <sub>6</sub> F <sub>5</sub> (C <sub>2</sub> F <sub>5</sub> )P(O)H ( <b>39b</b> ) | -1.9                  | -10.8                     | 3.6        | -4.8                                  | 1.0        |

<sup>a</sup> At PBE1PBE/6-31G(d)//PBE1PBE/6-31G(d).

**Table S10.** Calculated (unscaled and scaled) and experimental  $^{31}\text{P}$  CSs ( $\delta_{\text{exp}}$ , ppm) for **35**, **40-48**.

| $N_{\text{O}}$  | PBE1PBE/6-31G(d)//<br>PBE1PBE/6-31G(d) <sup>a</sup> |                                | PBE1PBE/6-31G(2d)//<br>PBE1PBE /6-31G(d) <sup>a</sup> |                              | PBE1PBE/6-311G(2d,2p)//<br>HF/6-31G(d) <sup>a</sup> |                              | PBE1PBE/6-311G(2d,2p)//<br>PBE1PBE/6-31G(d) <sup>a</sup> |                              | $\delta_{\text{exp}}$           | Solvent                | Ref. |
|-----------------|-----------------------------------------------------|--------------------------------|-------------------------------------------------------|------------------------------|-----------------------------------------------------|------------------------------|----------------------------------------------------------|------------------------------|---------------------------------|------------------------|------|
|                 | Unscaled                                            | Scaled                         | Unscaled                                              | Scaled                       | Unscaled                                            | Scaled                       | Unscaled                                                 | Scaled                       |                                 |                        |      |
| <b>35</b>       | 34.6<br>291.3                                       | 41.0<br>320.6                  | 24.0<br>258.8                                         | 55.4<br>297.2                | 78.6<br>350.6                                       | 80.5<br>333.7                | 32.1<br>309.6                                            | 43.3<br>302.0                | 54.8<br>322.9                   | $\text{C}_6\text{H}_6$ | 97   |
| <b>40</b>       | -160.1<br>67.7                                      | -171.1<br>77.0                 | -194.2<br>48.5                                        | -169.3<br>80.6               | -146.4<br>74.8                                      | -129.0<br>76.9               | -172.4<br>63.9                                           | -147.3<br>72.9               | -157.7<br>76.7                  | na <sup>b</sup>        | 98   |
| <b>41</b>       | -108.6                                              | -115.0                         | -131.0                                                | -104.2                       | -133.3                                              | -116.8                       | -129.3                                                   | -107.2                       | -110.0                          | na                     | 99   |
| <b>42</b>       | -62.0                                               | -64.2                          | -71.9                                                 | -43.3                        | -66.2                                               | -54.4                        | -68.6                                                    | -50.5                        | -54.5                           | na                     | 100  |
| <b>43</b>       | -24.1<br>95.1<br>7.7<br>73.3                        | -23.0<br>106.8<br>11.7<br>83.1 | -29.7<br>100.5<br>-10.6<br>75.7                       | -25.6<br>99.9<br>2.4<br>77.7 | -6.7<br>61.8<br>-51.1<br>56.5                       | 1.1<br>64.8<br>-40.3<br>59.8 | -41.9<br>84.1<br>-7.1<br>58.7                            | -25.7<br>91.7<br>6.7<br>68.1 | -29.7<br>100.5<br>-10.6<br>75.7 | $\text{CHCl}_3$        | 101  |
| <b>44</b>       | 27.6                                                | 33.3                           | 15.0                                                  | 46.1                         | 22.7                                                | 28.4                         | 22.5                                                     | 34.3                         | 24.0                            | $\text{C}_6\text{H}_6$ | 102  |
| <b>45</b>       | 88.7<br>-19.0                                       | 99.9<br>-22.6                  | 51.8<br>-50.7                                         | 84.0<br>-21.6                | 88.6<br>-27.6                                       | 89.8<br>-18.5                | 74.3<br>-36.5                                            | 82.6<br>-20.6                | 84.1<br>-22.6                   | $\text{CHCl}_3$        | 103  |
| <b>46</b>       | 21.2<br>12.4                                        | 26.4<br>16.8                   | 15.4<br>3.5                                           | 46.5<br>34.3                 | 15.8<br>6.5                                         | 21.9<br>13.3                 | 15.0<br>5.8                                              | 27.4<br>18.8                 | 27.6<br>18.3                    | $\text{CHCl}_3$        | 104  |
| <b>47</b>       | -13.9                                               | -11.9                          | -36.1                                                 | -6.5                         | -1.7                                                | 5.7                          | -23.1                                                    | -8.1                         | -10.2                           | $\text{CHCl}_3$        | 105  |
| <b>48</b>       | 34.1                                                | 40.4                           | 10.3                                                  | 41.2                         | 50.4                                                | 54.2                         | 36.8                                                     | 47.7                         | 38.7                            | $\text{CHCl}_3$        | 106  |
| $R^2$           | 0.992                                               | 0.992                          | 0.989                                                 | 0.989                        | 0.967                                               | 0.967                        | 0.996                                                    | 0.996                        |                                 |                        |      |
| $RMSE$ ,<br>ppm | 11.1                                                | 9.4                            | 29.3                                                  | 11.6                         | 19.9                                                | 18.2                         | 13.6                                                     | 9.0                          |                                 |                        |      |

<sup>a</sup> First row – level of theory used for CS calculation, second row – for geometry optimization; <sup>b</sup> not available.



**Table S11.** Experimental ( $\delta_{\text{exp}}$ ) and calculated ( $\delta_{\text{scaled}}$ )<sup>a</sup>  $^{31}\text{P}$  CSS,  $\Delta\delta = \delta_{\text{scaled}} - \delta_{\text{exp}}$  for isomers of **45**.

| Isomers | $\delta_{\text{exp}}$ |                | $\delta_{\text{scaled}}$ |                | $\Delta\delta$ |                |
|---------|-----------------------|----------------|--------------------------|----------------|----------------|----------------|
|         | P <sub>1</sub>        | P <sub>2</sub> | P <sub>1</sub>           | P <sub>2</sub> | P <sub>1</sub> | P <sub>2</sub> |
| A       | -22.6                 | 84.1           | -20.6                    | 82.6           | 2.0            | -1.5           |
| B       |                       |                | -8.6                     | 34.3           | 14.0           | -49.8          |
| C       |                       |                | -18.2                    | 132.6          | 4.4            | 48.5           |
| D       |                       |                | -5.9                     | 91.7           | 16.7           | 7.6            |

<sup>a</sup> PBE1PBE/6-311G(2d,2p)//PBE1PBE/6-31+G(d).
